# Supplementary material for: Aneuploidy shortens replicative lifespan in Saccharomyces cerevisiae
Source: PubMed Central journal article supplement (PMC4783355; doi:10.1111/acel.12443), 2016-01-13

**chr1 disome,  $p = 0.1834$** 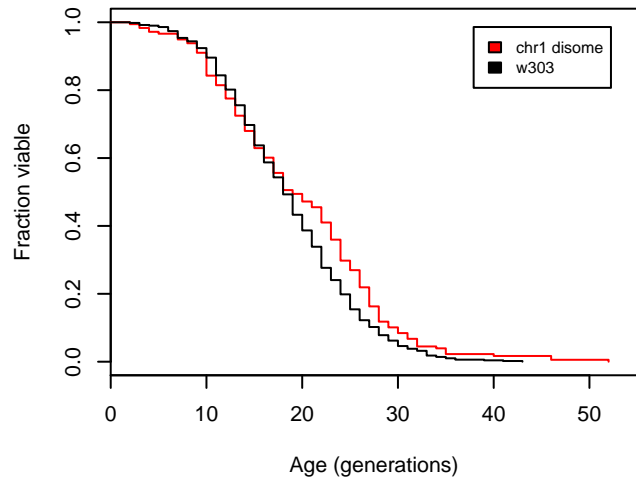**chr2 disome,  $p = 0.6504$** 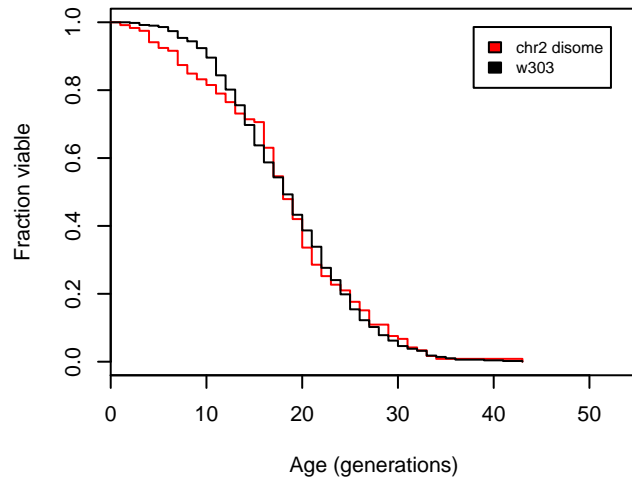**chr 2 disome bul1D clone 1,  $p = 0.193$** 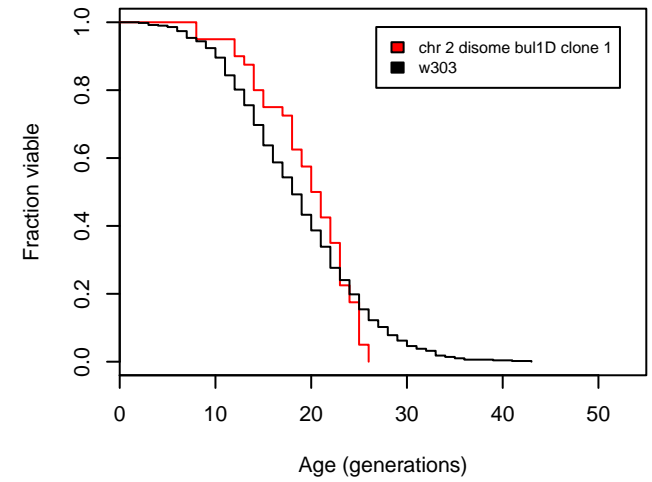**chr4 disome,  $p = 1.13e-80$** 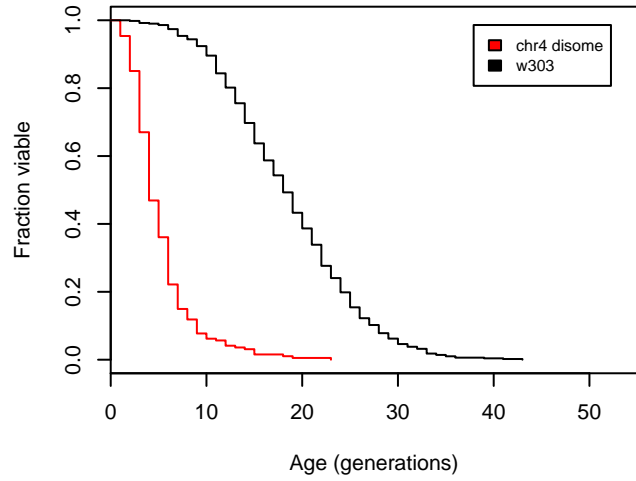**chr4 disome evolved clone 1,  $p = 3.403e-24$** 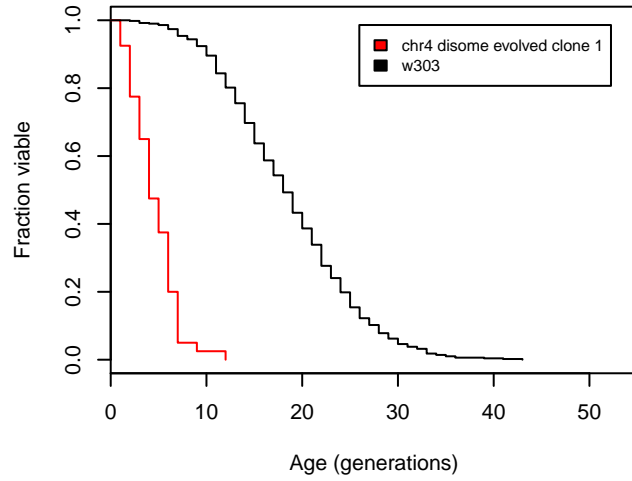**chr4 disome evolved clone 2,  $p = 0.7366$** 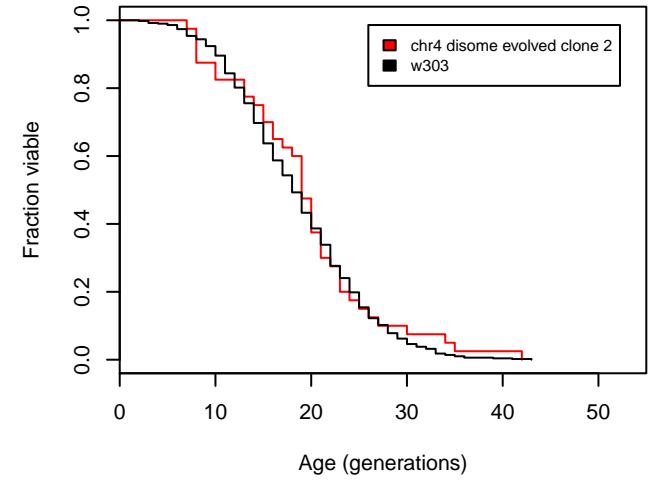**chr5 disome,  $p = 3.134e-62$** 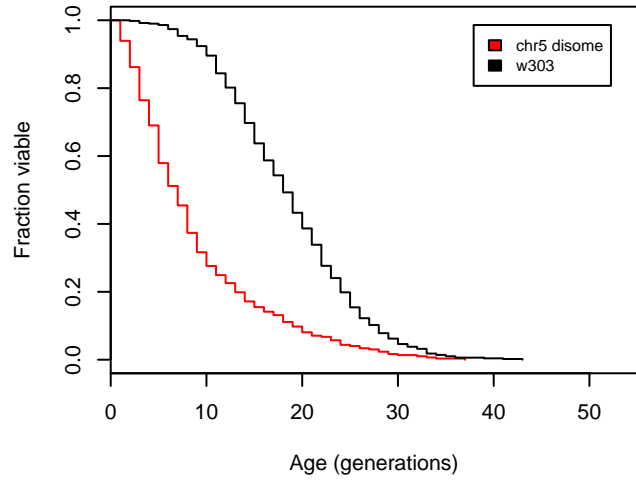**chr5 disome evolved clone 1,  $p = 4.788e-15$** 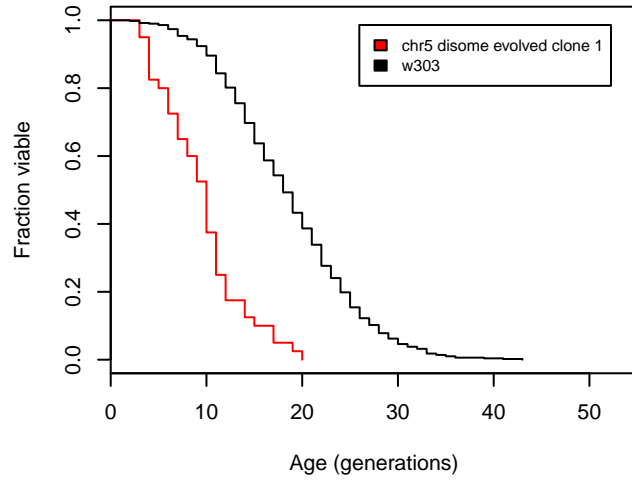**chr5 disome evolved clone 2,  $p = 0.02788$** 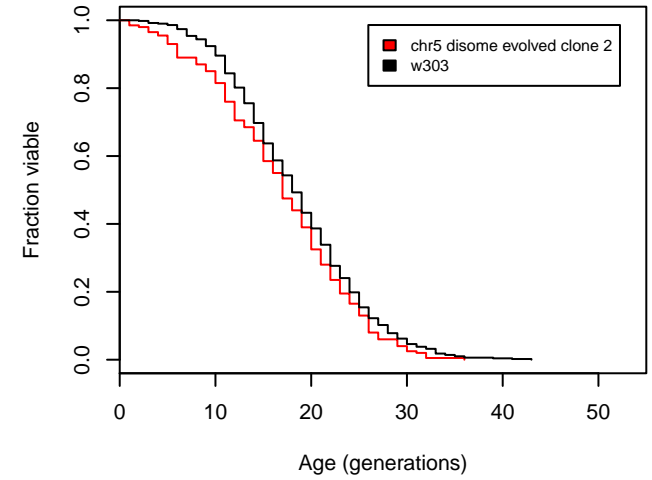

**chr5 disome BUL1 (MD308-D5),  $p = 1.413e-18$**

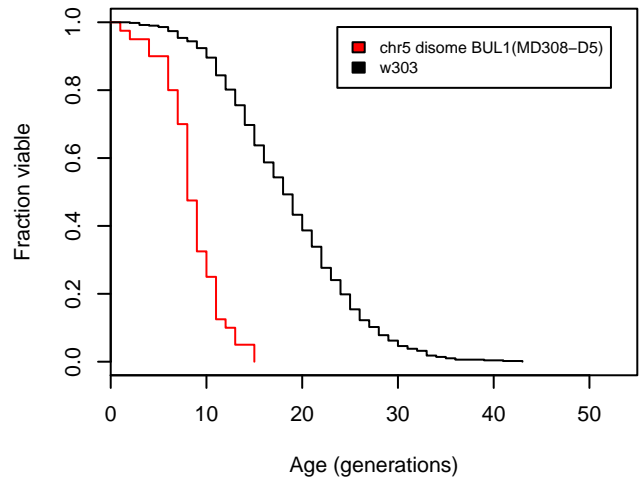

**chr5 disome BUL1 (MD308-E4),  $p = 1.535e-14$**

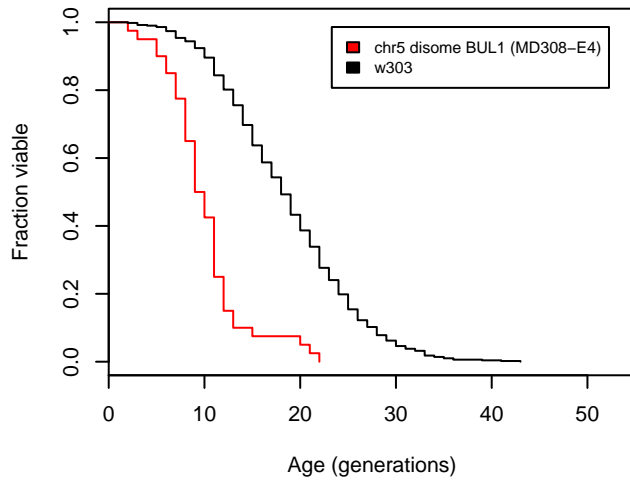

**chr5 disome BUL1 (MD308-H4),  $p = 5.445e-14$**

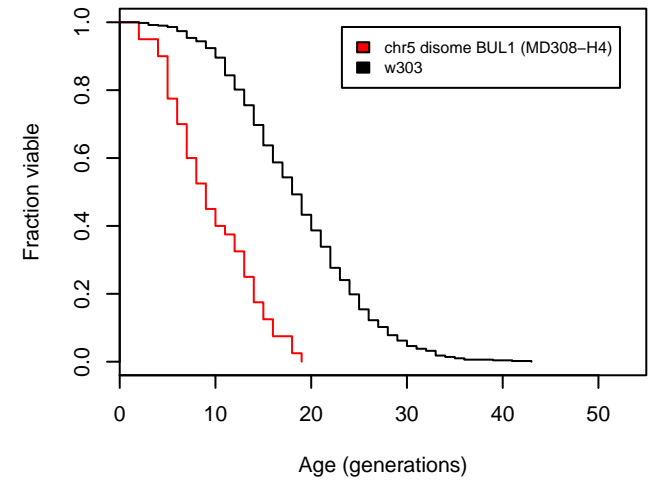

**chr5 disome BUL1 (MD309-B5),  $p = 1.481e-13$**

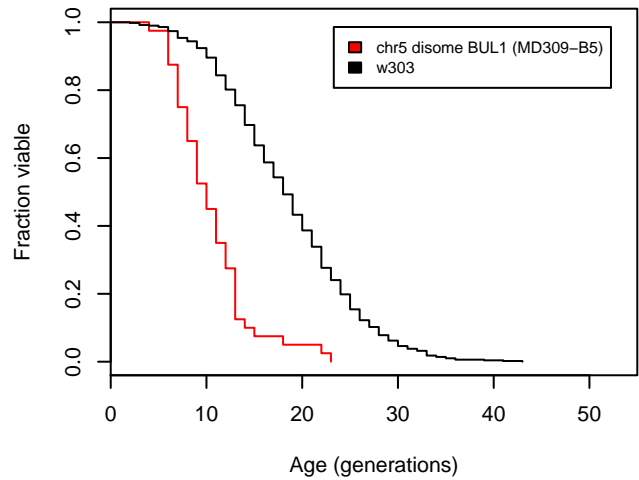

**chr5 disome bul1Q146K (MD308-C2),  $p = 0.5733$**

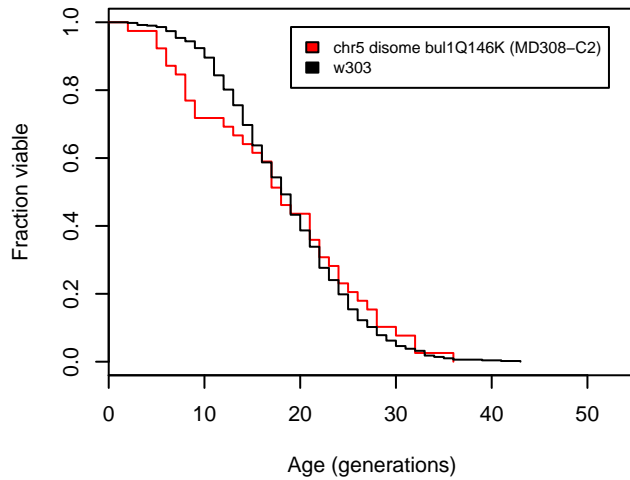

**chr5 disome bul1Q146K (MD308-D1),  $p = 0.9761$**

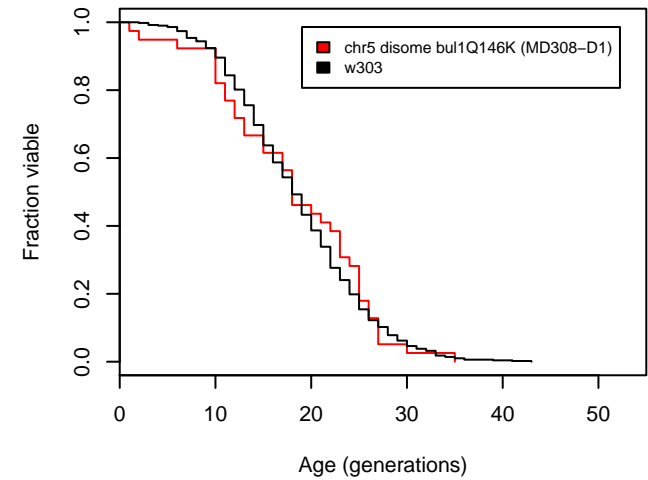

**chr5 disome bul1Q146K (MD308-H5),  $p = 0.4947$**

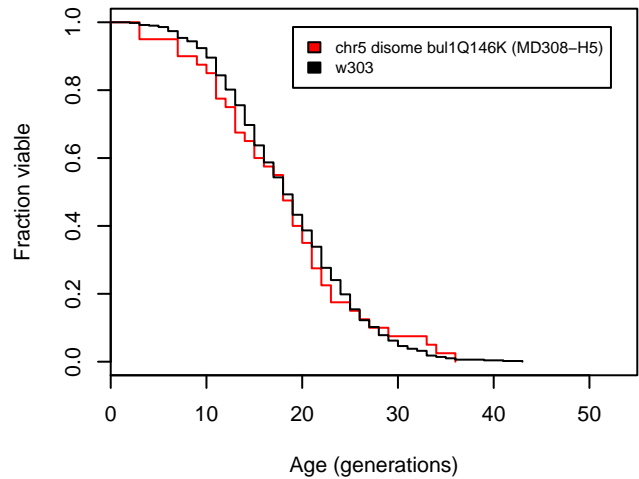

**chr5 disome bul1Q146K (MD309-A7),  $p = 0.02525$**

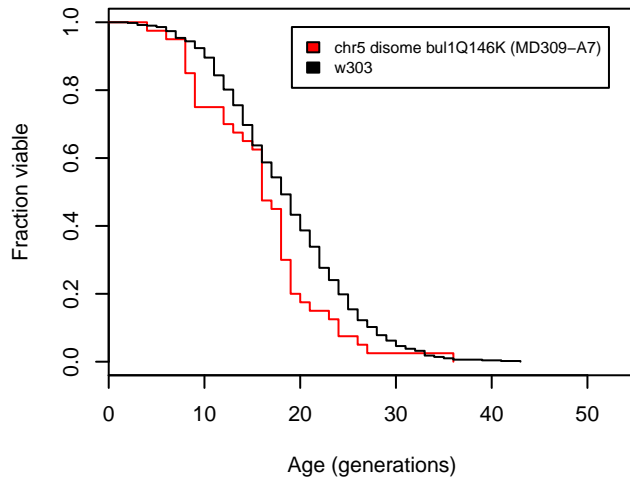

**chr5 disome bul1Q146K (MD309-E3),  $p = 0.2709$**

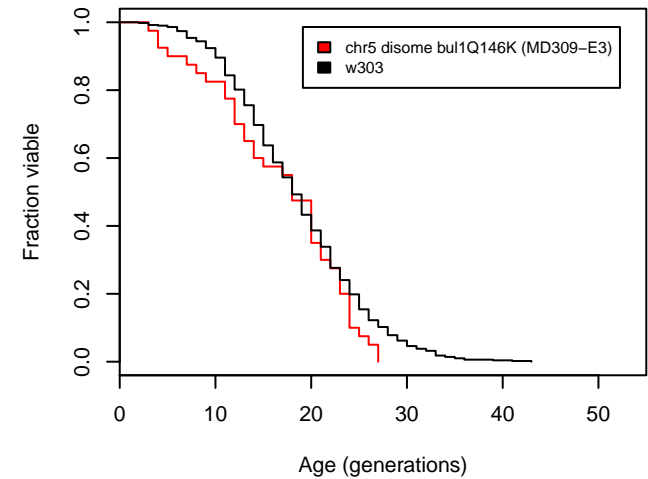

**euploid bul1Q146K (MD308-C9),  $p = 0.08638$**

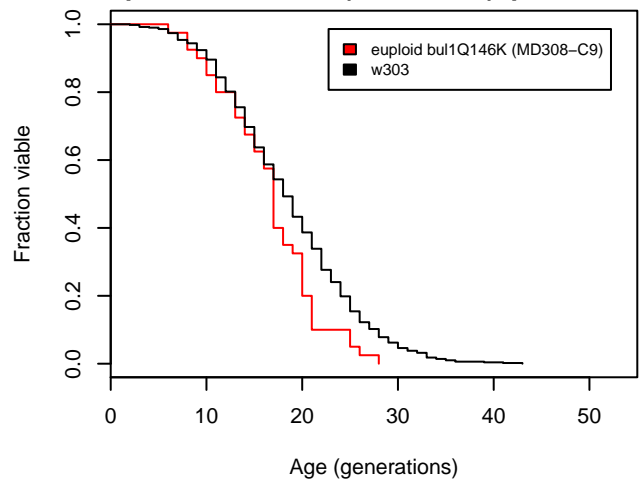

**euploid bul1Q146K (MD308-G3),  $p = 0.07617$**

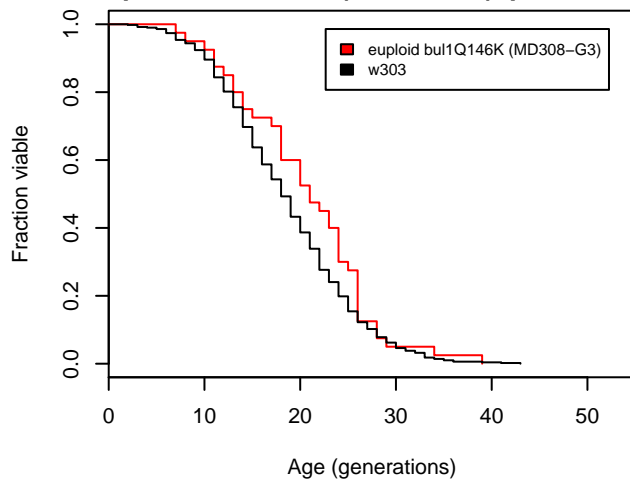

**euploid bul1Q146K (MD309-A3),  $p = 0.001824$**

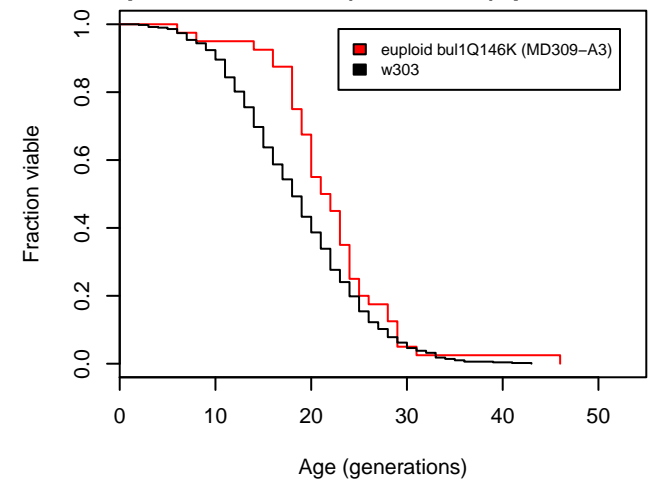

**chr5 disome bul1D c1,  $p = 1.255e-05$**

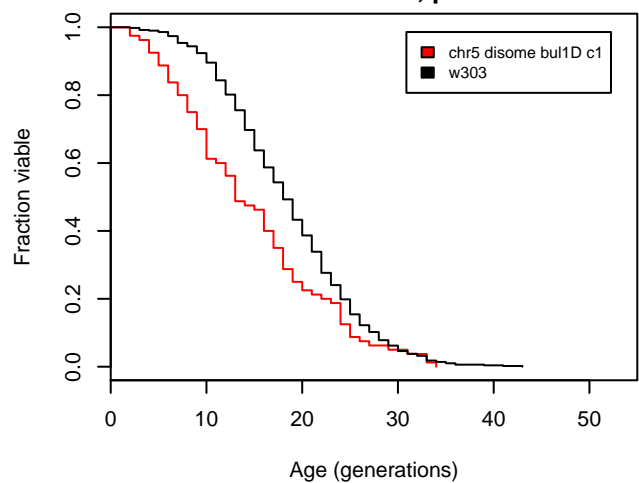

**chr5 disome bul1D c2,  $p = 1.955e-05$**

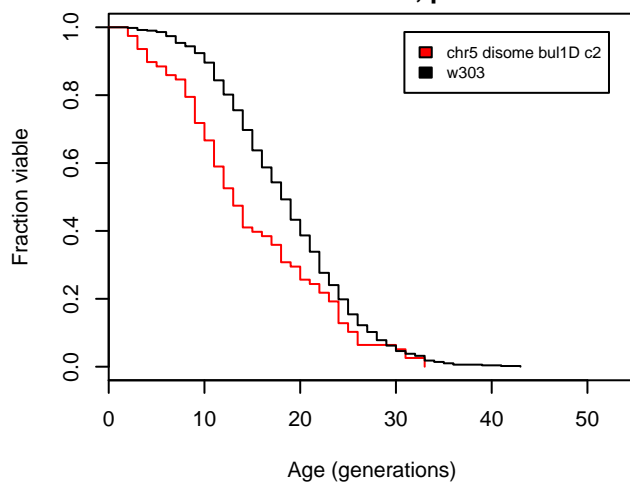

**chr5 disome bul1Q146K c2,  $p = 0.001254$**

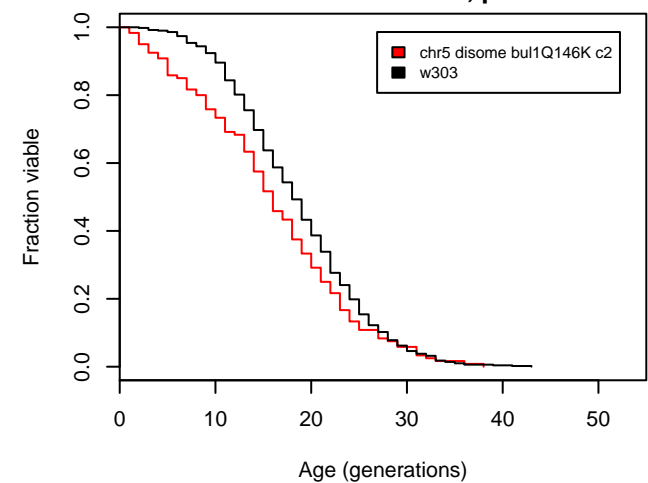

**chr8 disome,  $p = 0.001814$**

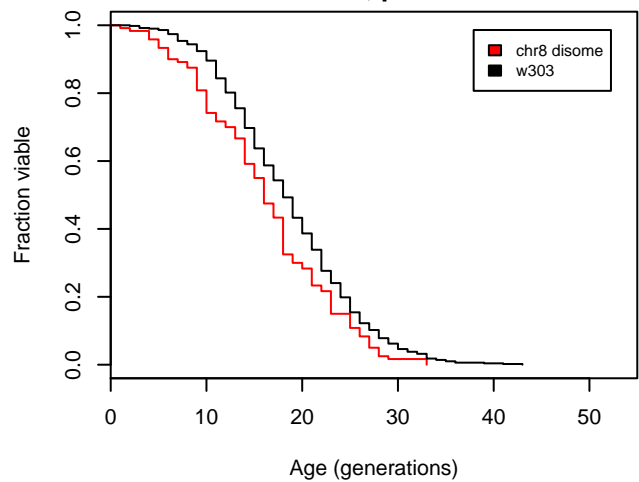

**chr8 disome bul1D c1,  $p = 1.277e-07$**

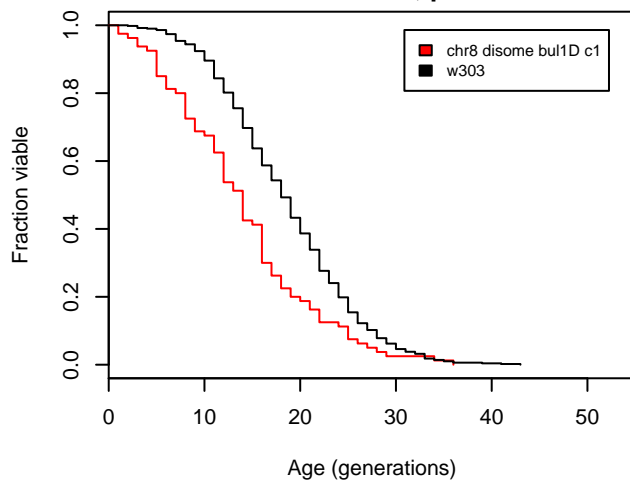

**chr8 disome bul1D c2,  $p = 1.969e-06$**

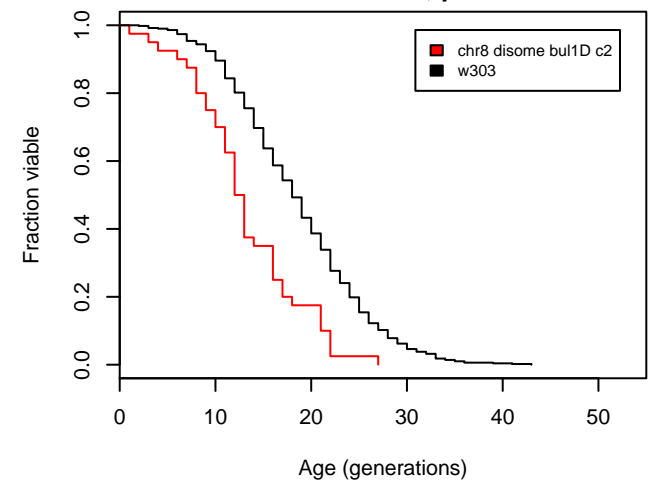

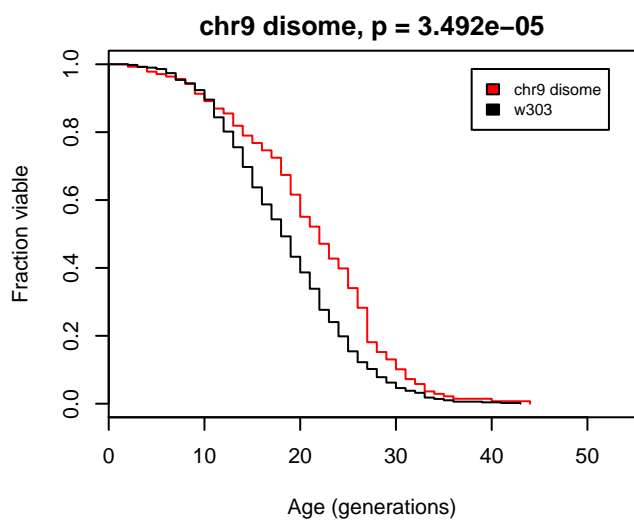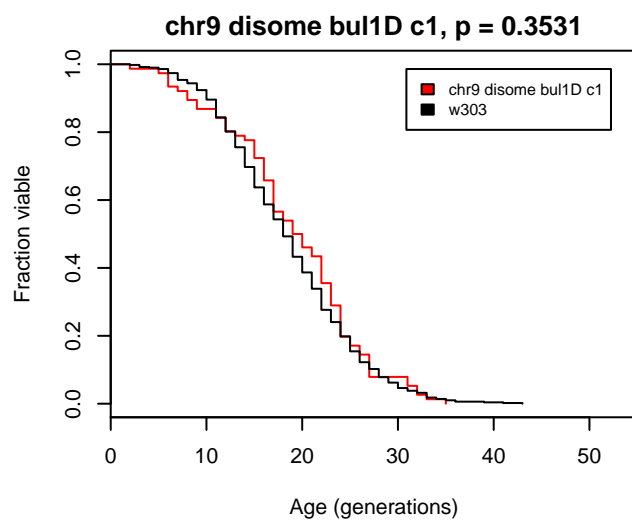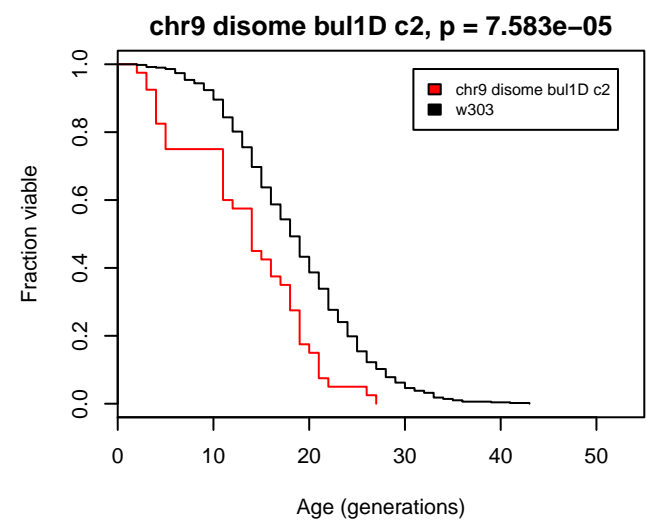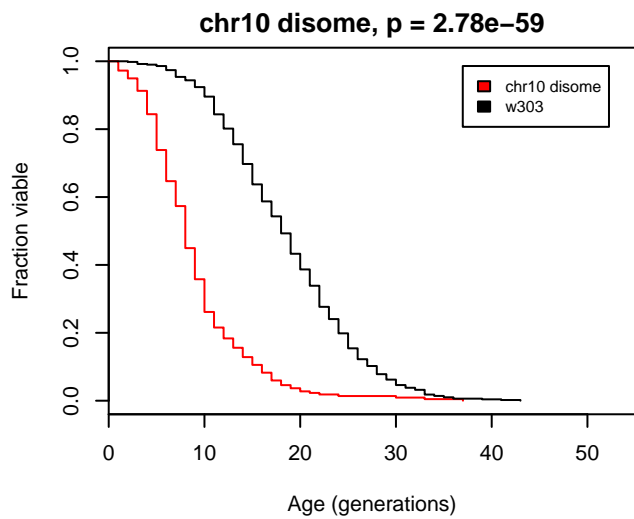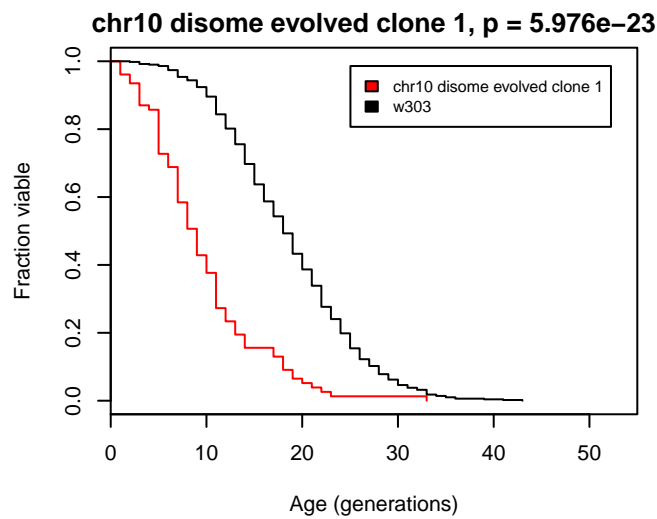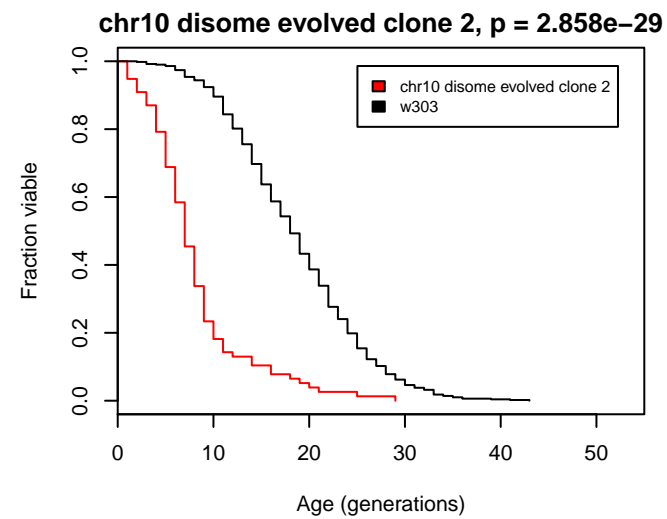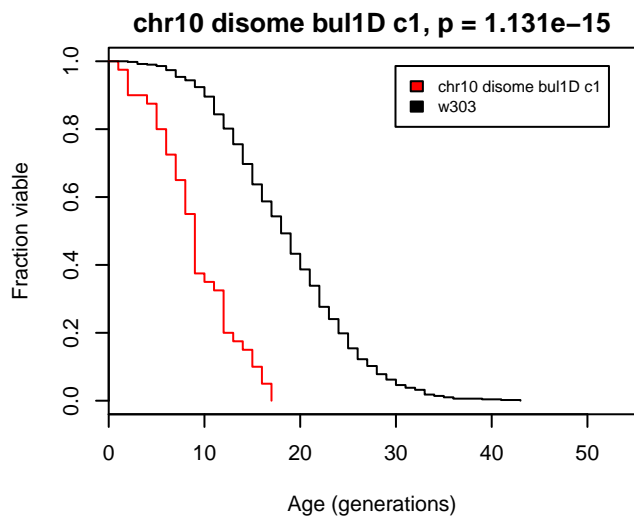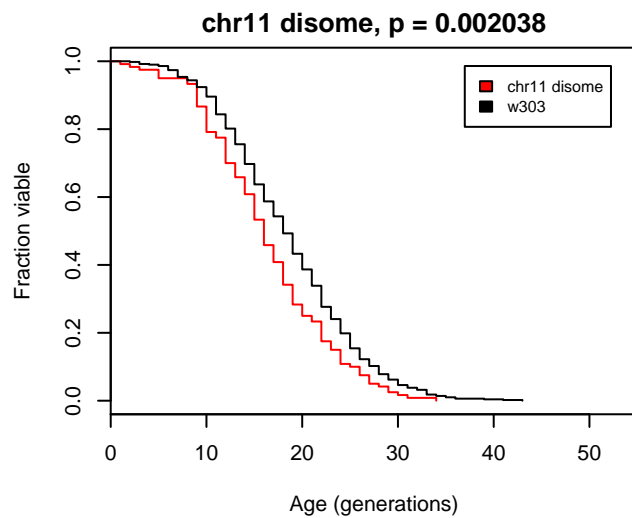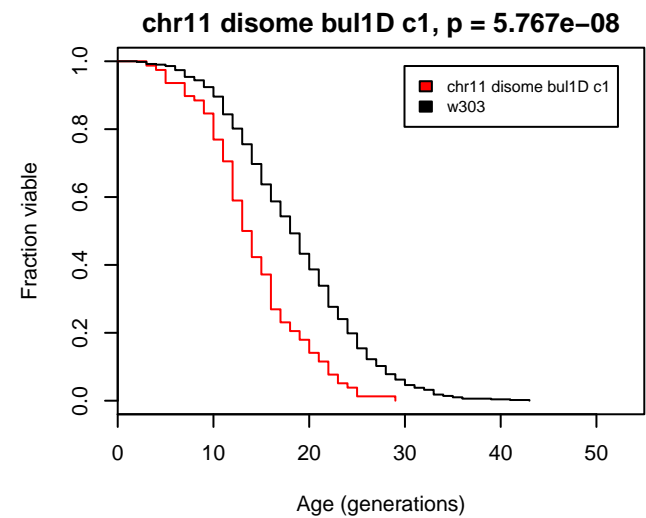

**chr11 disome bul1D c2,  $p = 6.418e-09$**

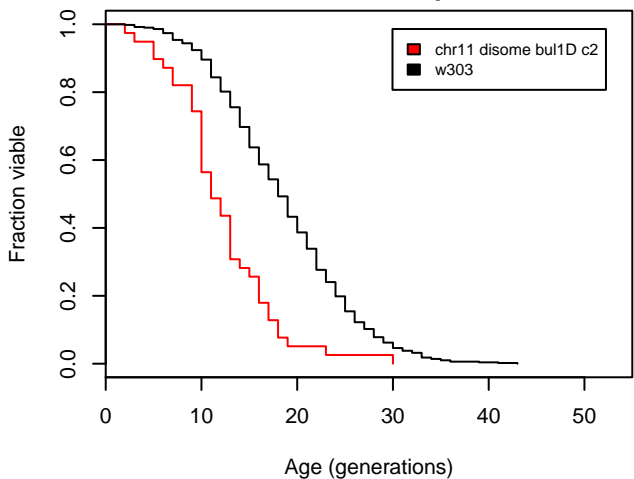

**chr12 disome,  $p = 7.674e-14$**

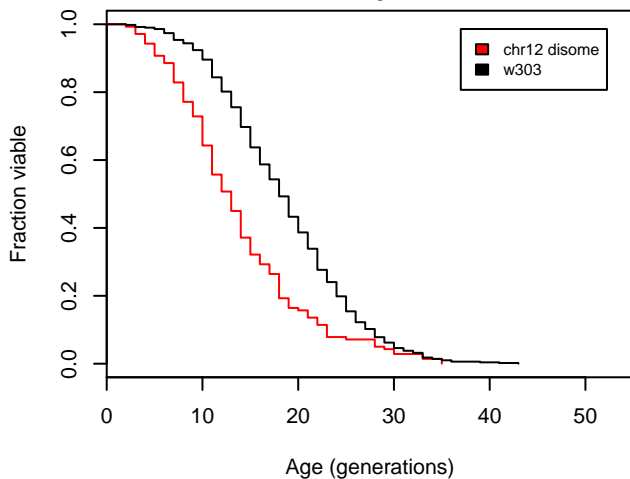

**chr12 disome evolved clone 1,  $p = 0.5262$**

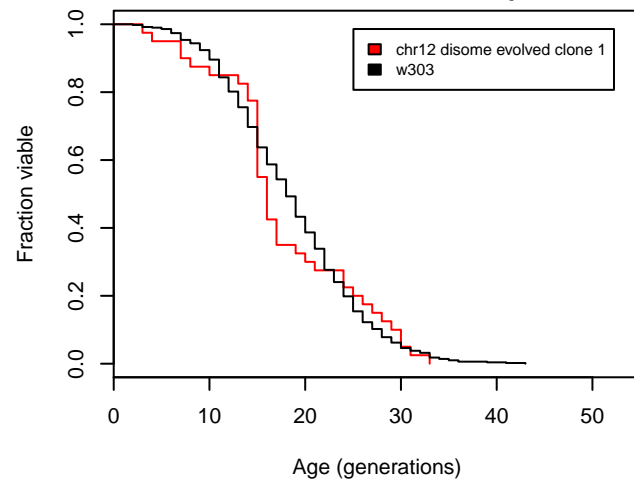

**chr12 disome evolved clone 2,  $p = 0.1163$**

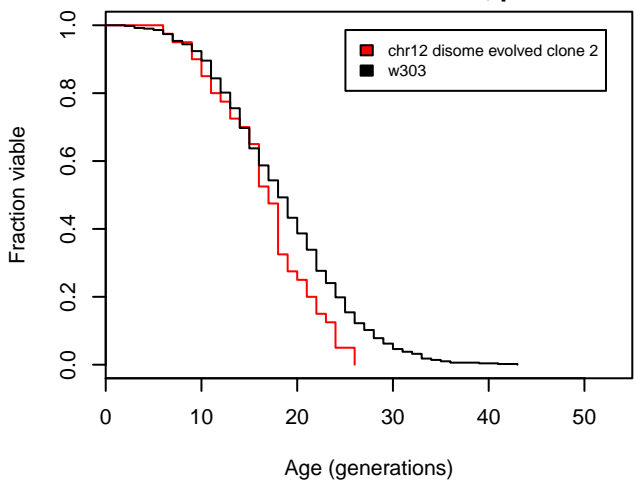

**chr13 disome,  $p = 0.0003567$**

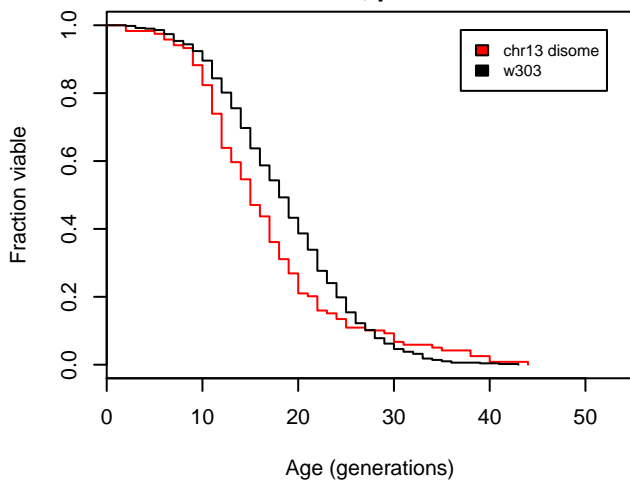

**chr13 disome evolved clone 1,  $p = 0.02318$**

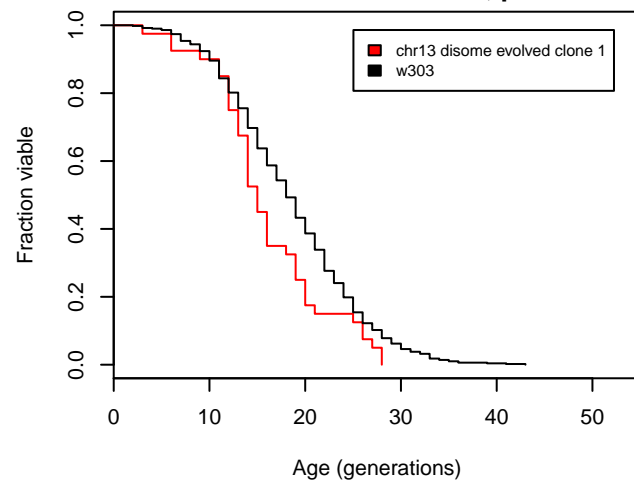

**chr14 disome,  $p = 6.575e-71$**

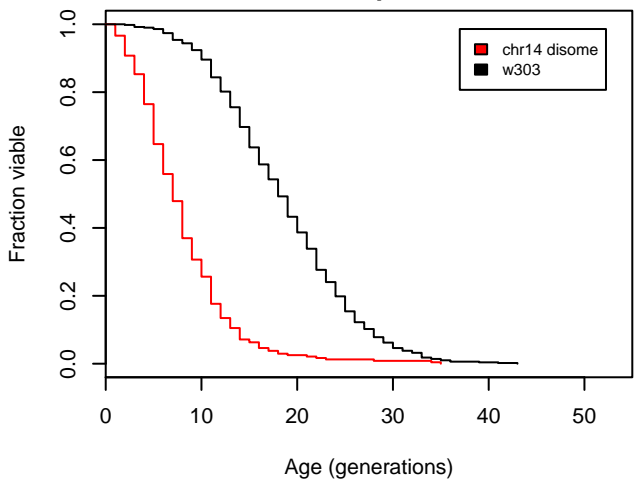

**chr14 disome evolved clone 1,  $p = 1.242e-05$**

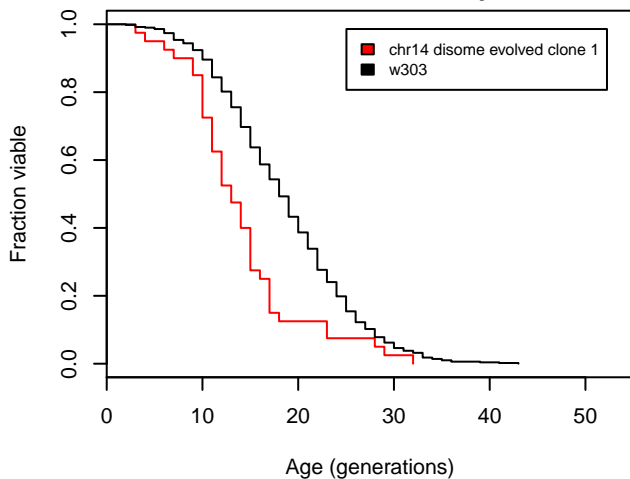

**chr14 disome evolved clone 2,  $p = 5.354e-47$**

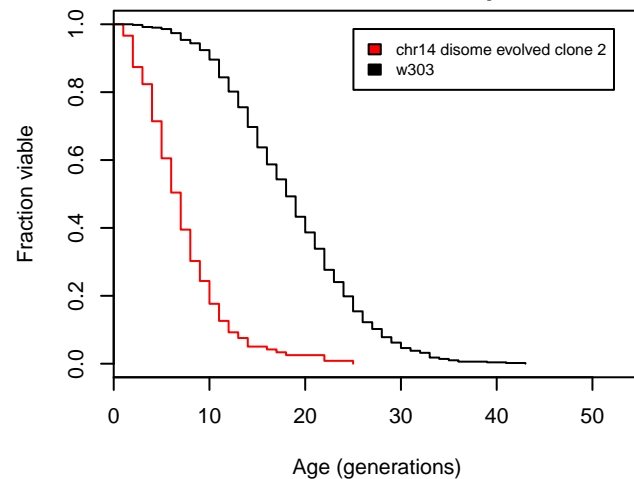

**chr14 disome bul1D c1,  $p = 8.024e-17$**

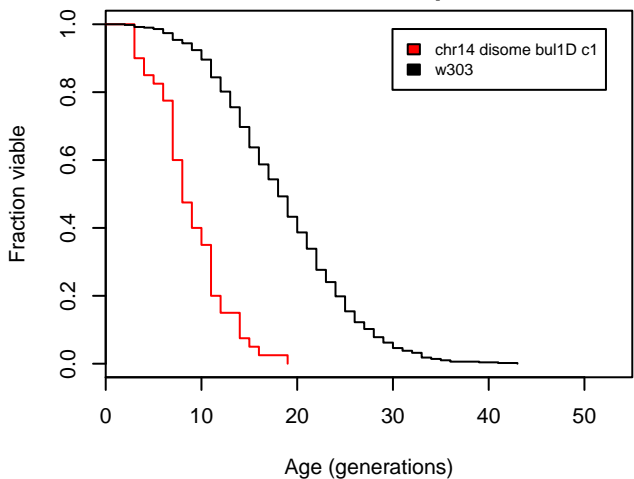

**chr15 disome,  $p = 9.995e-14$**

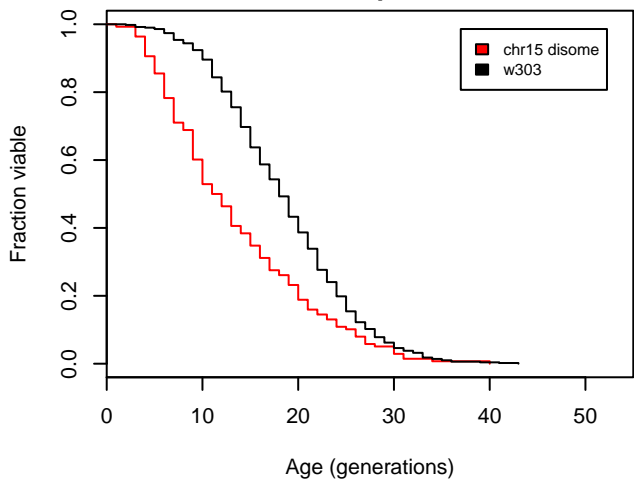

**chr15 disome evolved clone 1,  $p = 0.2945$**

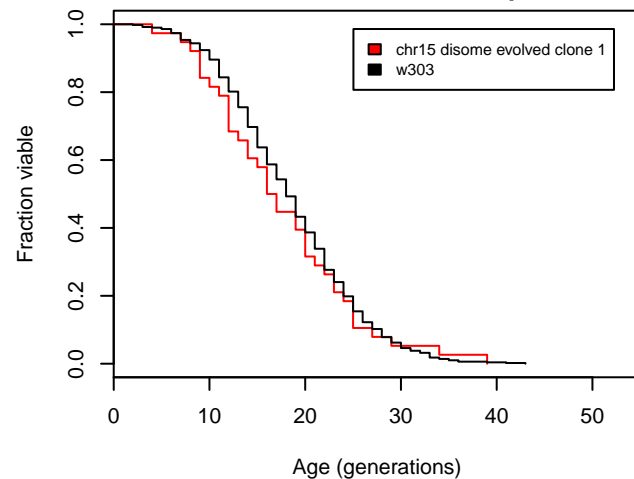

**chr15 disome evolved clone 2,  $p = 0.3345$**

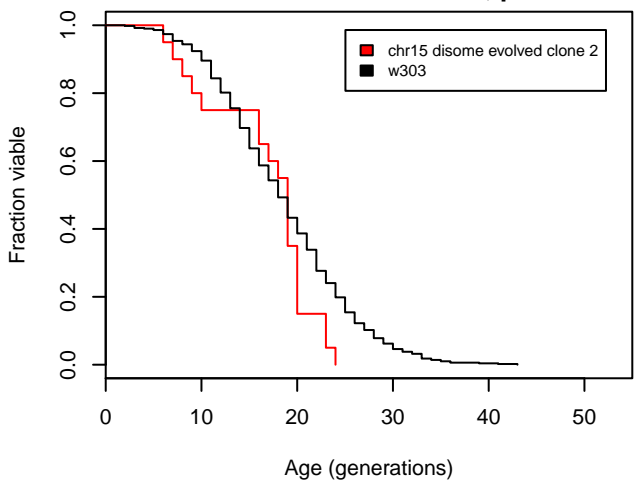

**chr16 disome,  $p = 2.155e-09$**

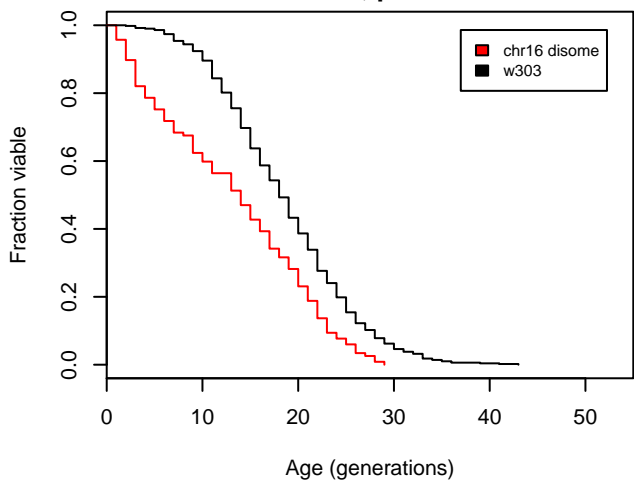

**chr16 disome bul1D c1,  $p = 5.571e-09$**

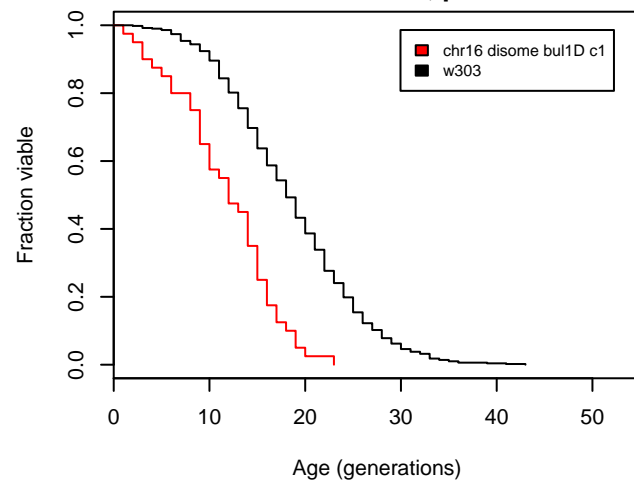

**w303 bul1D c1,  $p = 0.388$**

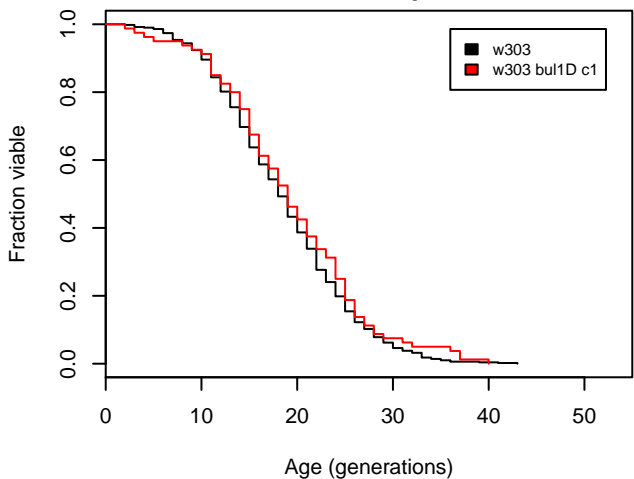

**w303 bul1D c2,  $p = 0.9234$**

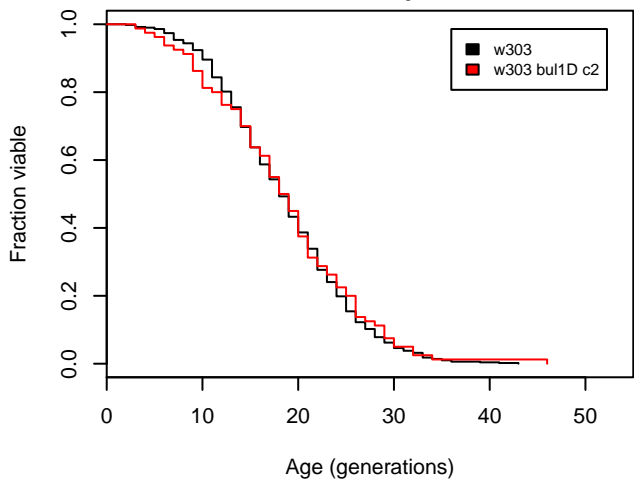

**w303 bul1Q146K c1,  $p = 0.4381$**

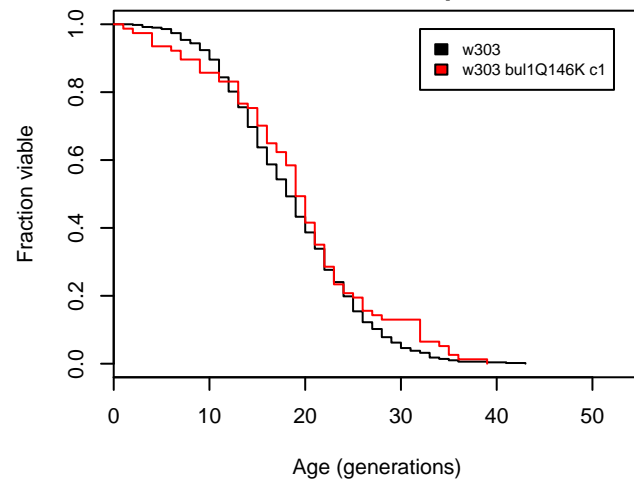

**w303 bul1Q146K c2,  $p = 5.918e-07$** 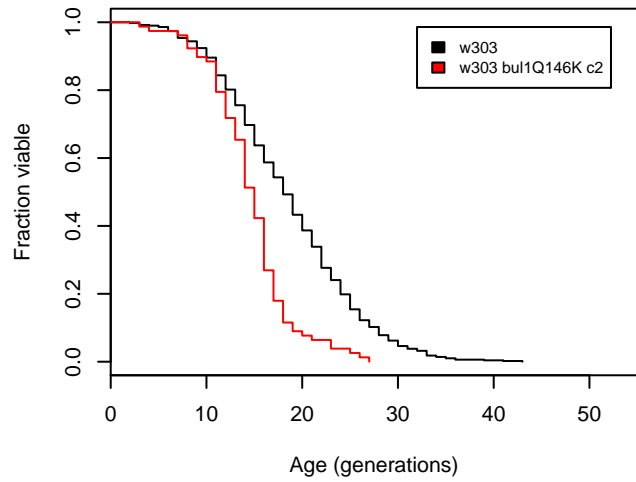**YAC-1,  $p = 0.2732$** 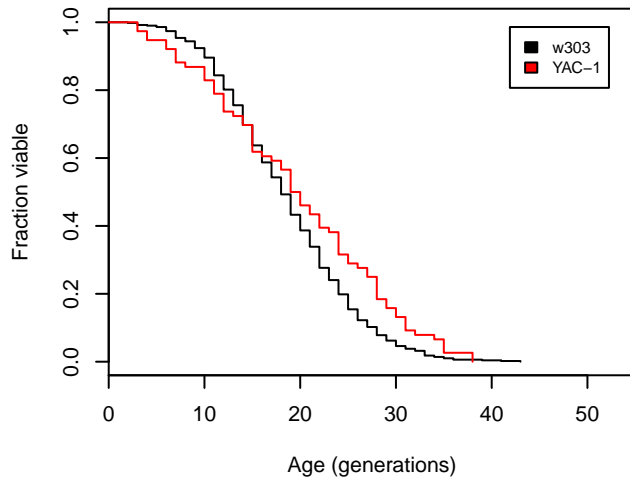**YAC-1c,  $p = 0.5122$** 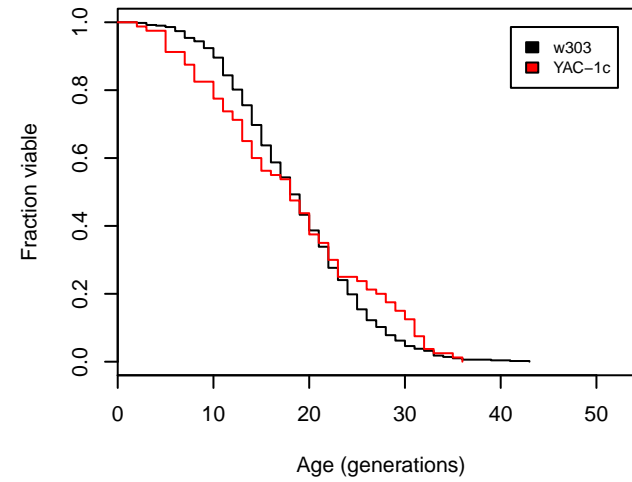**YAC-2,  $p = 9.266e-06$** 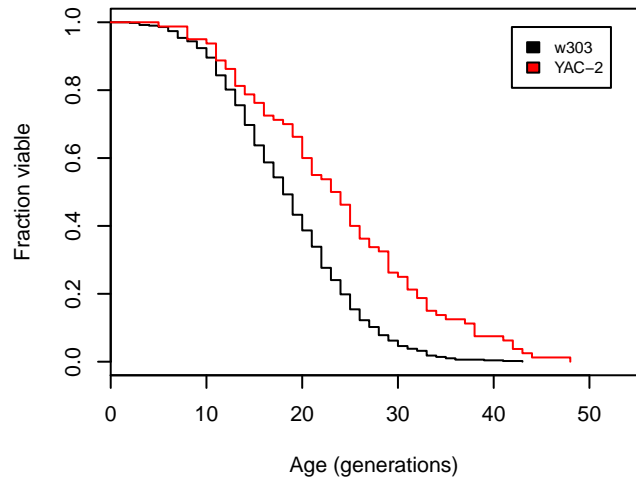**YAC-3,  $p = 0.6855$** 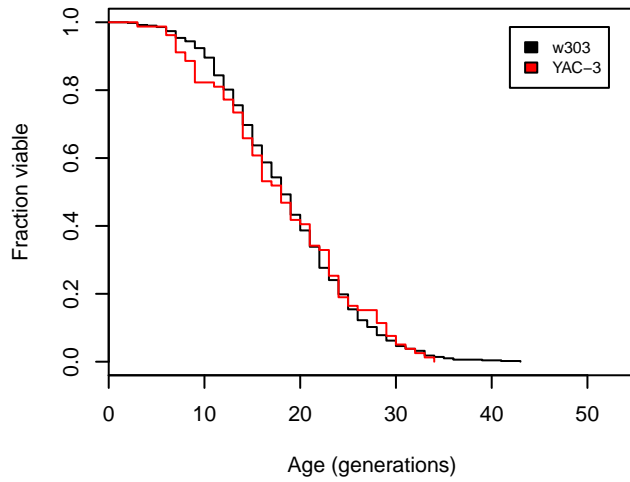**YAC-4,  $p = 0.4573$** 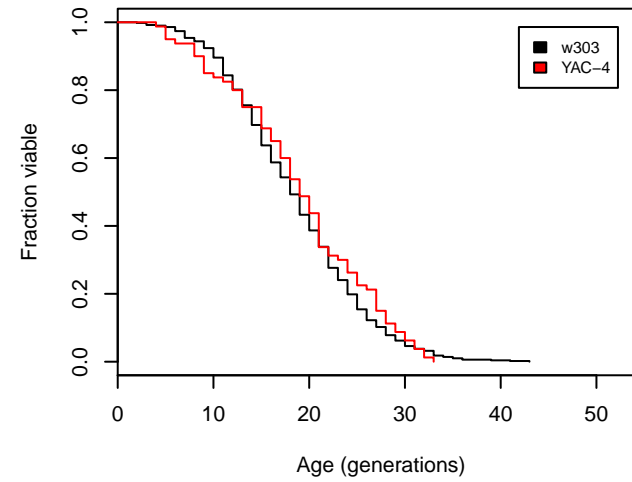**YAC-6,  $p = 0.4925$** 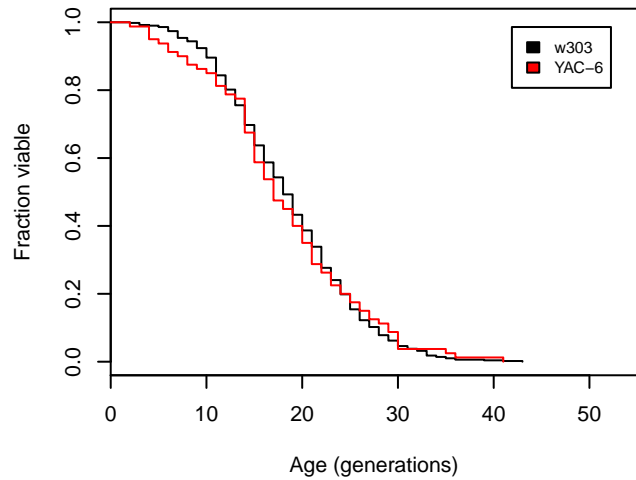**YAC-7,  $p = 4.111e-06$** 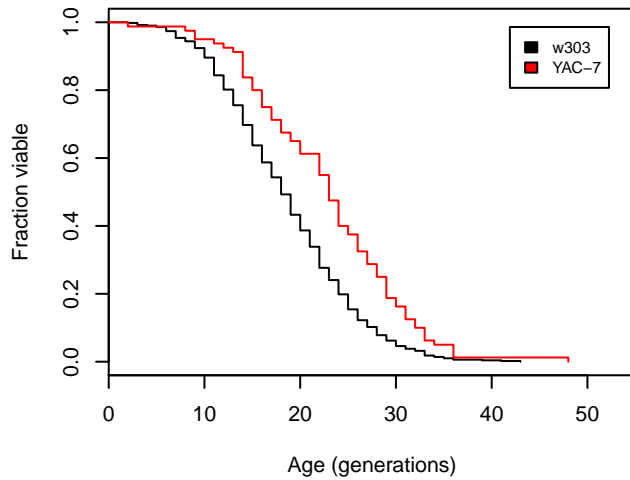

Supplement: ACEL-15-317-s001.pdf [file ACEL-15-317-s001.pdf]
