# Supplementary material for: Aneuploidy shortens replicative lifespan in Saccharomyces cerevisiae
Source: PubMed Central journal article supplement (PMC4783355; doi:10.1111/acel.12443), 2016-01-13

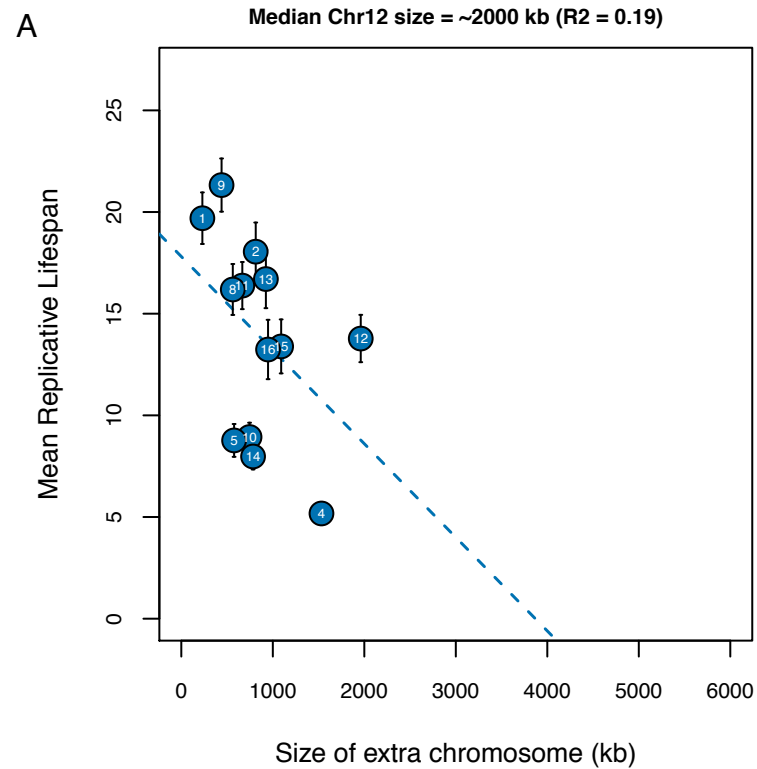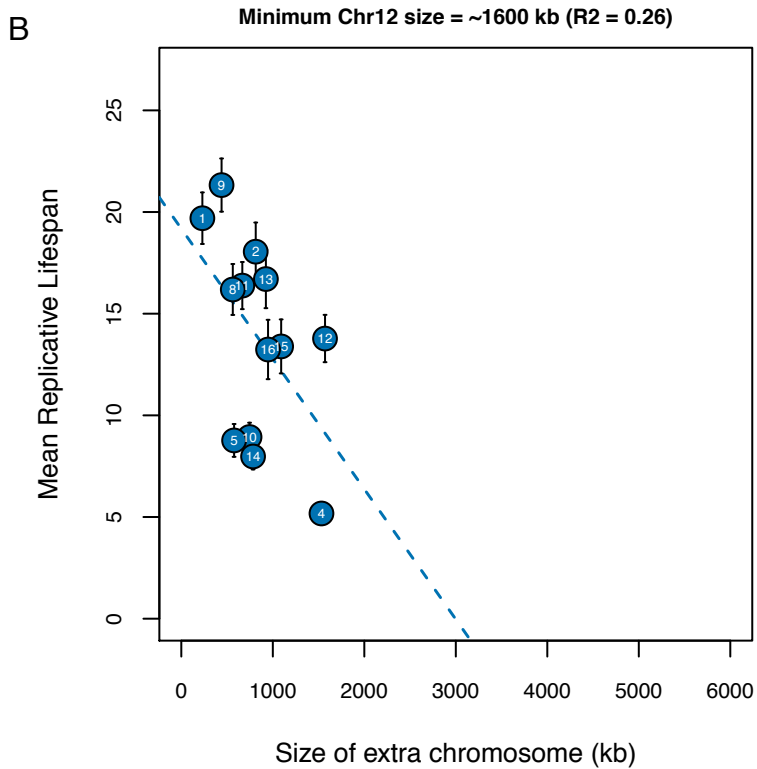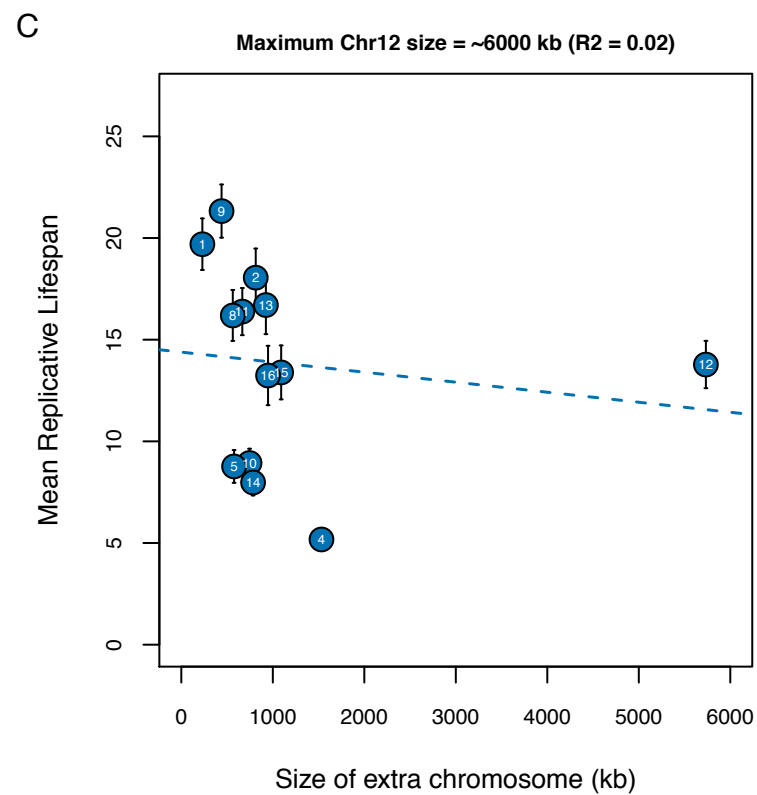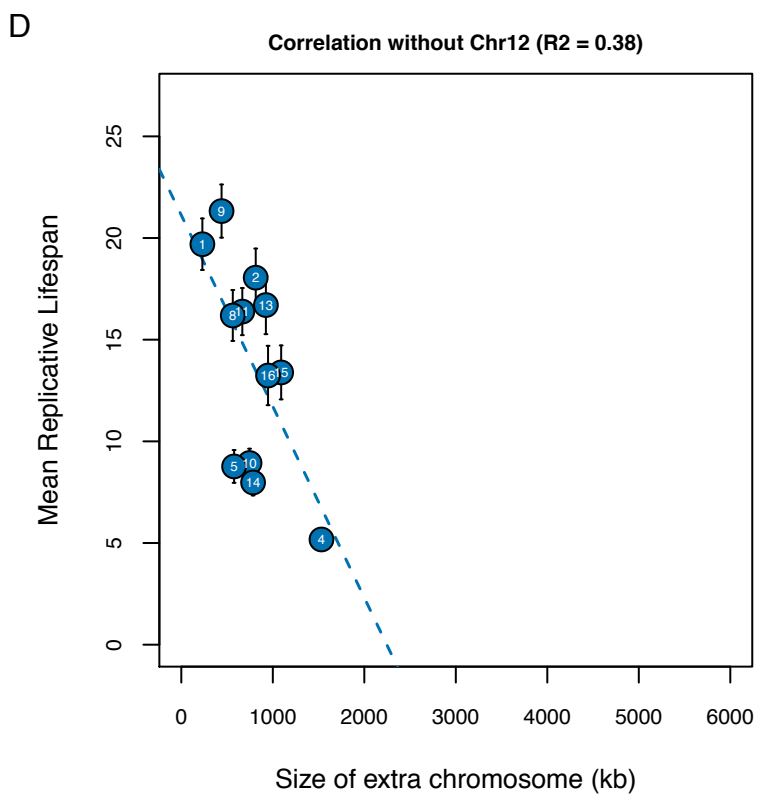

Supplement: ACEL-15-317-s002.pdf [file ACEL-15-317-s002.pdf]
